# Supplementary material for: Small RNA profiling of low biomass samples: identification and removal of contaminants
Source: PubMed Central journal article supplement (PMC5952572; doi:10.1186/s12915-018-0522-7), 2018-05-14

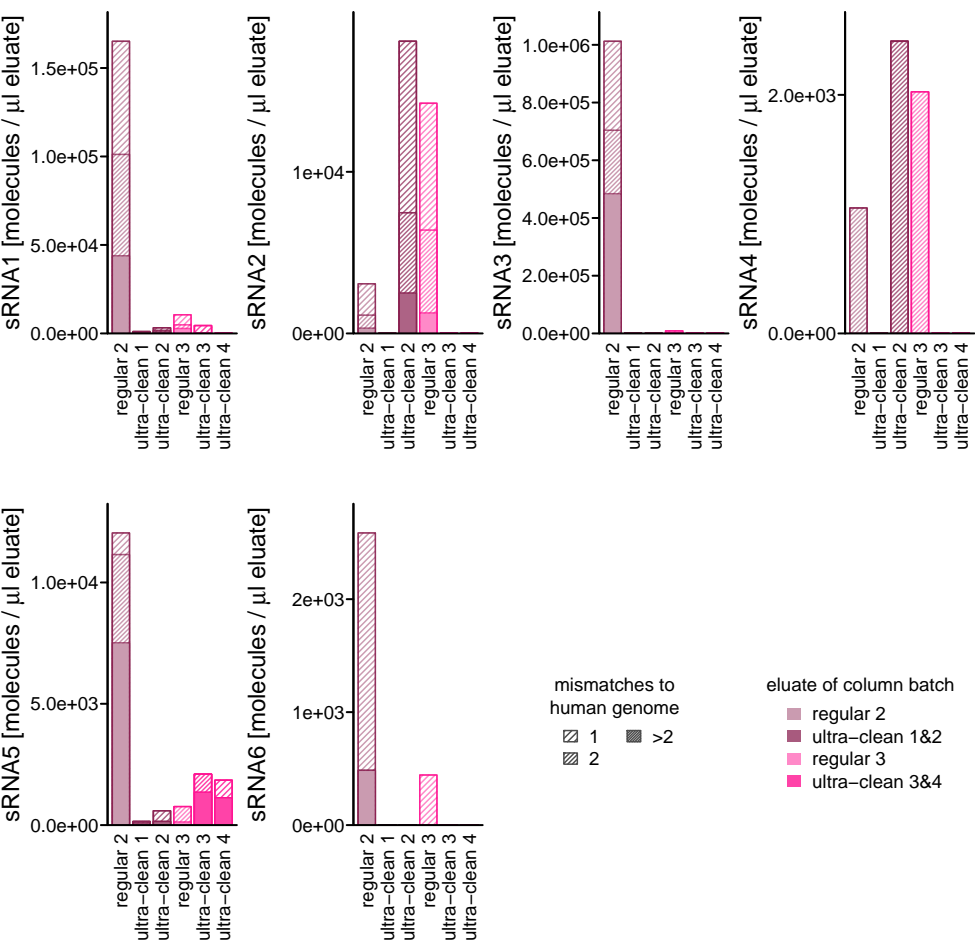

Supplement: 12915_2018_522_MOESM4_ESM.pdf [file 12915_2018_522_MOESM4_ESM.pdf]
